# Supplementary material
Source: HighWire-hosted journal article supplement (http://molpharm.aspetjournals.org/highwire/filestream/76546/field_highwire_adjunct_files/0/Figure_1_SD.pdf)
Supplement: Figure_1_SD.pdf [file Figure_1_SD.pdf]

**Signal Sequence**

5-HT3A -----MLLWVQALLALLPTLLAQGEARRSRNTRPALLRRLSDYLL  
5-HT3B -----MLSSVMAPLWACIL--VAA GILATDTHHPQDSALYHLSKQLL  
5-HT3C -----MEGGWPARQSALLCLTVSLLLQGRGDAFTINCSGFGDQHGVDPAVF  
5-HT3D -----  
5-HT3E **MLAFILSRATPRPALG**PLSYREHRVALLHLTHSMSTTGRGVFTFTINCSGFGQHGDPTAL  
5-HT3Ea -----MEGSWFHRKRF SFYLLLGFLQGRGVFTFTINCSGFGQHGDPTAL

5-HT3A TNY--RKGVRPVRDWRKPTTVSIVDIYVAILNVDEKNQVLTTYIWYRQYWTDFLQWNPE  
5-HT3B QKY--HKEVRPVYNWTKATTVYLDLFDVHAILDVAENQILKTSVWYQEVWDFLQWNSS  
5-HT3C QAVFDRKAFRPFNTNYSIPTRVNISFTLSAILGVDAQLQLLTSFLWMDLVWDPNPFINWNP  
5-HT3D -----  
5-HT3E NSVFNKRKPRPVTNISVPTQVNISFAMSAILDVNEQLHLLSSFLWLEMVWDPNPFISWNP  
5-HT3Ea NSVFNKRKPRPVTNISVPTQVNISFAMSAILDVNEQLHLLSSFLWLEMVWDPNPFISWNP

**Cys-**

5-HT3A DFDNITKLSIPTDSIWVPDILINEFVDVGKSPNIPYVYIRHQGEVQNYKPLQVVTACSLD  
5-HT3B MFDEIREISLPLSAIWAPDIIINEFVDIERYPDLPYVYVNSSGTIENYKPIQVVSACSLE  
5-HT3C **EC**CVGINKLTVLAENLWLPDIFIVESMDVDQTPSGLTAYISSEGRIKYDKPMRVTSICCKLD  
5-HT3D -----  
5-HT3E **EC**CEGITKMSMAAKNLWLPDIFIIEELMDVDKTPKGLTAYVSNEGRIRYKPKMKVDSICNLD  
5-HT3Ea **EC**CEGITKMSMAAKNLWLPDIFIIEELMDVDKTPKGLTAYVSNEGRIRYKPKMKVDSICNLD

**Loop**

5-HT3A **IY**FPFDVQNC SLTFTSWLHTIQDINISLWRLPEKVKSDRSVFMNQGEWELLGVLVYFR  
5-HT3B **TY**AFPFDVQNC SLTFKSI LHTVEDVDLAFLRSPEDIQH-DKKAFLNDSEWELLSVSSTY-  
5-HT3C **IF**YFPFDQQNC TTFSSFLYTVDSMLLGMDEKVEWEITDTSRKVIQTQGEWELLGINKATP  
5-HT3D -----MASMSIVKATSNTISQCGWSASANWTP-SISPSMD  
5-HT3E **IF**YFPFDQQNC TLTFSFLYTVDSMLLDMKEVWEITDASRNILQTHGEWELLGLSKATA  
5-HT3Ea **IF**YFPFDQQNC TLTFSFLYTVDSMLLDMKEVWEITDASRNILQTHGEWELLGLSKATA

**Epitope** **TM1**

5-HT3A EFSMESSNYAEMKFYVIRRRPL**FYVVSLLLPSIFLMVMDIVGFYLP**PPNSGERVSFKIT  
5-HT3B SILQSSAGGFAQIQFNVMRRHPL**VYVVSLLLPSIFLMLVDLGSFYLP**PPNCRARIVFKTS  
5-HT3C KMSMGNNL-YDQIMFYVAIRRRPS**LYVINLLVPSGFLVAIDALSFYLP**PAESENRAFPKIT  
5-HT3D RA**ERS**PSA-LSPTQVAIRHRCRPS**PYVFNFLVPSGILIAIDALSFYLP**PPESGNCAFPKIT  
5-HT3E KLSRGGNL-YDQIVFYVAIRRRPS**LYVINLLVPSGFLVAIDALSFYLP**VKSGNRVFPKIT  
5-HT3Ea KLSRGGNL-YDQIVFYVAIR RPS**LYVINLLVPSGFLVAIDALSFYLP**VKSGNRVFPKIT

**TM2** **TM3**

5-HT3A **LLL**GYSVFLIIVSDTLPATAI**GTPLI**-----**GVYFVVC**MALLVISLAETIF  
5-HT3B **VLV**GYTVFRVNMSNQVPRSV**GTPLI**-----**GHFFTIC**MAFLVLSLAKSIV  
5-HT3C **LLL**GYNVFLLMNDLLP--AS**GTPLI**-----**SVYFAL**CLSLMVVSLLETIF  
5-HT3D **VLL**GYSVFLLMNDLLP--ATSTSSHASLVRPHPSRDQKR**GVYFAL**CLSLMVGSLETIF  
5-HT3E **LLL**GYNVFLLMMSDLLP--TS**GTPLI**-----**GVYFAL**CLSLMVGSLETIF  
5-HT3Ea **LLL**GYNVFLLMMSDLLP--TS**GTPLI**-----**GVYFAL**CLSLMVGSLETIF

5-HT3A **I**VRLVH-KQDLQQPVPAWLRHLVLERIAWLLCLREQSTSQRPPATSQA KT--DDCSAMG  
5-HT3B **L**VKFLHDEQRGGQEQP-----FL-CLRGDTADRPRVEPRAQRAVVTESLYG  
5-HT3C **I**TYLLHVATTQPPMPRWLHSL-----LLHCTSPGRCC--PTAPQKGNKG---LGLTL  
5-HT3D **I**THLLHVATTQPLPLRWLHSL-----LLHCTQGRC--PTAPQKGNKG---PGVTP  
5-HT3E **I**THLLHVATTQPPPLRWLHSL-----LLHCNSPGRCC--PTAPQKENKG---PGLTP  
5-HT3Ea **I**THLLHVATTQPPPLRWLHSL-----LLHCNSPGRCC--PTAPQKENKG---PGLTP

5-HT3A NHCSHMGQPQDFEKSPDRCSPPPPPREASLAVCGLLQELSSIRQFLEKRDEIREV---  
5-HT3B EHLAQPG-----T--LKE-----VWSQLQSI SNYLQTQDQTDQQ-----  
5-HT3C THLPGPK-----EPGELAGKLGPRE-----TEPDGGSAWTKTQL-----  
5-HT3D THLPGVK-----EPEVSAGQMPGPGE-----AELTGGSEWTRAQREHEAQKQHS  
5-HT3E THLPGVK-----EPEVSAGQMPGPAE-----AELTGGSEWTRAQREHEAQKQHS  
5-HT3Ea THLPGVK-----EPEVSAGQMPGPAE-----AELTGGSEWTRAQREHEAQKQHS

**TM4**

5-HT3A ARDWLRVGSVLDKLL**FHIYLLAVLAYSITLVMLWSIWQYA**  
5-HT3B EAEWLVLLSRFDRL**LFQSYLFMLGIYITITLCSLWALWGGV**  
5-HT3C MELWVQFSHAM**D**TL**LFRLYLLFM**ASSIITVIVLWNT---  
5-HT3D VELWVQFSHAM**D**ALL**FRLYLLFM**ASSIITVICLWNT---  
5-HT3E VELWVQFSHAM**D**AM**LFRLYLLFM**ASSIITVICLWNT---  
5-HT3Ea VELWVQFSHAM**D**AM**LFRLYLLFM**ASSIITVICLWNT---

Figure 1
